# Supplementary material
Source: publisher figshare collection journal article supplement (https://springernature.figshare.com/ndownloader/files/21633783)
Supplement: Supplementary file 1 [file 21633783]

**Table S6.** Raw data of imaging modalities in clinical studies.

| RUS | x-ray | AS | CXR | Abominal CT | Renal US scan | MRI | DMSA | VCUG | MAG3 | DCHCTS | doppler sonography |
| --- | --- | --- | --- | --- | --- | --- | --- | --- | --- | --- | --- |
| nl size |  |  |  |  |  |  |  |  |  |  |  |
|  | nl | nl |  |  |  |  |  |  |  |  |  |
|  | nl | nl |  |  |  |  |  |  |  |  |  |
| nl size |  | nl |  |  |  |  |  |  |  |  |  |
| mild cortical echogenic |  |  | nl |  |  |  |  |  |  |  |  |
|  |  | nl |  | ↓enhancementof kid |  |  |  |  |  |  |  |
|  |  |  |  |  |  |  |  |  |  |  |  |
|  |  |  |  |  | ↑echogenecity | nl |  |  |  |  |  |
|  |  | calculus |  |  |  |  |  |  |  |  |  |
| ↑,lt ston,UA crystal |  |  |  |  |  |  |  |  |  |  |  |
| nl |  |  |  |  |  |  |  |  |  |  |  |
| CM cyst |  |  |  |  |  |  |  |  |  |  |  |
| severe HUN |  |  |  |  |  |  | nl | nl | delayed excretion |  |  |
|  |  |  |  |  |  |  |  |  |  | patchy enhancement |  |
|  |  |  |  |  |  |  |  |  |  |  |  |
| small size kidney |  |  |  |  |  |  |  |  |  |  |  |
| bilat small size |  |  |  |  |  | no cyst |  |  |  |  |  |
| asymmetric size+cyst |  |  |  |  |  |  |  |  |  |  | rt:0.64,lt:0.7 |
| nl |  |  | nl |  |  |  |  |  |  |  |  |
| asymmetric lt kidney |  |  |  |  |  |  |  |  |  |  |  |
| a cyst |  |  |  |  |  |  |  |  |  |  |  |
|  |  |  |  |  | nl, small echodensed |  |  |  |  |  |  |
| bilat small kid |  |  |  |  |  |  |  |  |  |  |  |
|  |  |  |  |  |  |  |  |  |  |  |  |
| hyperechogenic echo |  |  |  |  |  |  |  |  |  |  |  |
| nl |  |  |  |  |  |  |  |  |  |  |  |
| nl |  |  |  |  |  |  |  |  |  |  |  |
| nl |  |  |  |  |  |  |  |  |  |  |  |
| small kidneys |  |  |  |  |  |  |  |  |  |  |  |
| small kidneys |  |  |  |  |  |  |  |  |  |  |  |
| ↓size+cyst |  |  |  |  |  |  |  |  |  |  |  |
| Rt renal hypoplasia |  |  |  |  |  |  |  |  |  |  |  |
| small size kidneys |  |  |  |  |  |  |  |  |  |  |  |
| nl kidney size+cyst |  |  |  |  |  |  |  |  |  |  |  |
| small kidneys,one cyst |  |  |  |  |  |  |  |  |  |  |  |
|  |  |  |  |  |  |  |  |  |  |  |  |
|  |  |  |  |  |  |  |  |  |  |  |  |
|  |  |  |  |  |  |  |  |  |  |  |  |
| nl |  |  |  |  |  |  |  |  |  |  |  |
| nl |  |  |  |  |  |  |  |  |  |  |  |
| nl |  | nl kidney size |  |  |  |  |  |  |  |  |  |
| nl |  |  |  |  |  |  |  |  |  |  |  |
| small sized kid |  |  |  |  |  |  |  |  |  |  |  |
| enlarged kid |  |  |  |  |  |  |  |  |  |  |  |
|  |  |  |  |  |  |  |  |  |  |  |  |
|  |  |  |  |  |  |  |  |  |  |  |  |
| small bilat hyperechogenic kid |  |  |  |  |  |  |  |  |  |  |  |
|  |  |  |  |  |  |  |  |  |  |  |  |
| chronic changes |  |  |  |  |  |  |  |  |  |  |  |
| high echogenicity,several cyst |  |  |  |  |  |  |  |  |  |  |  |
| nl |  |  |  |  |  |  |  |  |  |  |  |
| nl size,cyst |  |  |  |  |  |  |  |  |  |  |  |
| small kidney |  |  |  |  |  |  |  |  |  |  |  |
| small kidney |  |  |  |  |  |  |  |  |  |  |  |
| small kidney |  |  |  |  |  |  |  |  |  |  |  |
| small kidney |  |  |  |  |  |  |  |  |  |  |  |
| small kidney |  |  |  |  |  |  |  |  |  |  |  |
| normal kid |  |  |  |  |  |  |  |  |  |  |  |
| normal kidney |  |  |  |  |  |  |  |  |  |  |  |
| small kid, C.cyst |  |  |  |  |  |  |  |  |  |  |  |
| small kid, C.cyst |  |  |  |  |  |  |  |  |  |  |  |
| small kid, C.cyst |  |  |  |  |  |  |  |  |  |  |  |
| nl |  |  |  |  |  |  |  |  |  |  |  |
| nl |  |  |  |  |  |  |  |  |  |  |  |
|  |  |  |  |  |  |  |  |  |  |  |  |

Yellow color shows inherited tubulointerstitial kidney disease patients; white color shows inherited renal hypouricemia patients.
